# Supplementary material for: A Unique Mode of Coenzyme A Binding to the Nucleotide Binding Pocket of Human Metastasis Suppressor NME1
Source: MDPI journal article supplement (doi:10.3390/ijms24119359), 2023-05-27
Supplement: s1 [file s1]

## Supplementary Figures

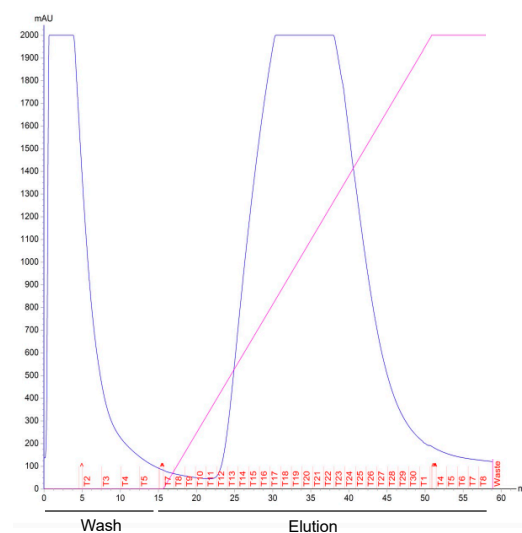

**Figure S1.** Affinity purification of hNME1. The hNME1 nickel-NTA affinity purification chromatogram is shown. The blue line represents the absorbance at 280 nm, and the pink line represents the linear gradient elution of hNME1 from 0 to 100% imidazole.

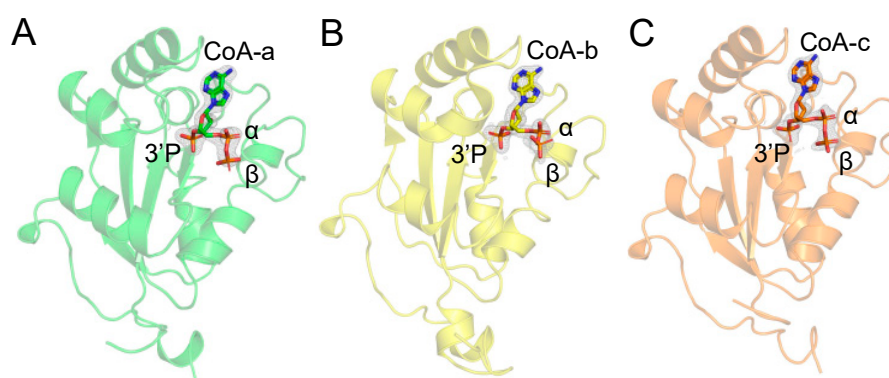

**Figure S2. Composite omit maps of the hNME1-CoA monomers.** The structure of hNME1-CoA monomers (A) a, (B) b and (C) c are shown. The gray Fo-Fc omit maps surrounding CoA at contoured level  $1.5\sigma$  are shown. Electron density (gray) is observed surrounding the 3'-phosphorylated ADP moiety but is absent for the pantetheine tail. CoA is shown in green (A), yellow (B) or orange (C) Sticks and is colored by element, where the nitrogen, oxygen, and phosphorous atoms are in blue, red and orange, respectively.
